# Supplementary material for: Phenotypic Epithelial Changes in Laryngotracheal Stenosis
Source: PubMed Central journal article supplement — Laryngoscope. 2022 Feb 10;132(11):2194–201. doi: 10.1002/lary.30040 (PMC9363526; doi:10.1002/lary.30040), 2022-02-10
Supplement: NIHMS1818459-supplement-Supplemental_Table_1.pdf [file NIHMS1818459-supplement-Supplemental_Table_1.pdf]

Supplemental Table 1 – Primer Sequences

| <b><u>Gene</u></b> | <b><u>Primer Sequences</u></b> |                                |
|--------------------|--------------------------------|--------------------------------|
|                    | Forward                        | Reverse                        |
| <i>GADPH</i>       | GGA GCG AGA TCC CTC CAA AAT    | GGC TGT TGT CAT ACT TCT CAT GG |
| <i>CK14</i>        | TGA GCC GCA TTC TGA ACG AG     | GAT GAC TGC GAT CCA GAG GA     |
| <i>CK5</i>         | CCA AGG TTG ATG CAC TGA TGG    | TGT CAG AGA CAT GCG TCT GC     |
| <i>TP63</i>        | GGA CCA GCA GAT TCA GAA CGG    | AGG ACA CGT CGA AAC TGT GC     |
| <i>TUBA1A</i>      | CCA GAT GCC AAG TGA CCA        | GAT CTC CTT GCC AAT GGTGT      |
| <i>CALM1</i>       | TTG ACT TCC CCG AAT TTT TGA CT | GGA ATG CCT CAC GGA TTT CTT    |
| <i>MUC5AC</i>      | CGG CCT TCT TCA ACA CCT TCA    | CAC CAG TGC TGA GCA TAC TTC    |
| <i>CCSP</i>        | TCC ACC ATG AAA CTC GCT GCT    | TCG ATG ACA CGC TGA AAG CTC    |
